# Supplementary material
Source: publisher figshare collection journal article supplement (https://acs.figshare.com/ndownloader/files/4412659)
Supplement: Supplementary file 1 [file 4412659]

 
data_shelxl 
  
_audit_creation_method            SHELXL-97 
_chemical_name_systematic 
; 
 ? 
; 
_chemical_name_common             ? 
_chemical_melting_point           ? 
_chemical_formula_moiety          'C31 H27 Br N O3 P S' 
_chemical_formula_sum 
 'C31 H27 Br N O3 P S' 
_chemical_formula_weight          604.48 
  
loop_ 
 _atom_type_symbol 
 _atom_type_description 
 _atom_type_scat_dispersion_real 
 _atom_type_scat_dispersion_imag 
 _atom_type_scat_source 
 'C'  'C'   0.0033   0.0016 
 'International Tables Vol C Tables 4.2.6.8 and 6.1.1.4' 
 'H'  'H'   0.0000   0.0000 
 'International Tables Vol C Tables 4.2.6.8 and 6.1.1.4' 
 'N'  'N'   0.0061   0.0033 
 'International Tables Vol C Tables 4.2.6.8 and 6.1.1.4' 
 'O'  'O'   0.0106   0.0060 
 'International Tables Vol C Tables 4.2.6.8 and 6.1.1.4' 
 'P'  'P'   0.1023   0.0942 
 'International Tables Vol C Tables 4.2.6.8 and 6.1.1.4' 
 'S'  'S'   0.1246   0.1234 
 'International Tables Vol C Tables 4.2.6.8 and 6.1.1.4' 
 'Br'  'Br'  -0.2901   2.4595 
 'International Tables Vol C Tables 4.2.6.8 and 6.1.1.4' 
  
_symmetry_cell_setting            orthorhombic 
_symmetry_space_group_name_H-M    'P 21 21 21' 
  
loop_ 
 _symmetry_equiv_pos_as_xyz 
 'x, y, z' 
 'x+1/2, -y+1/2, -z' 
 '-x, y+1/2, -z+1/2' 
 '-x+1/2, -y, z+1/2' 
  
_cell_length_a                    10.2600(10) 
_cell_length_b                    8.4860(10) 
_cell_length_c                    30.754(3) 
_cell_angle_alpha                 90.00 
_cell_angle_beta                  90.00 
_cell_angle_gamma                 90.00 
_cell_volume                      2677.6(5) 
_cell_formula_units_Z             4 
_cell_measurement_temperature     113(2) 
_cell_measurement_reflns_used     7689 
_cell_measurement_theta_min       2.10 
_cell_measurement_theta_max       28.20 
  
_exptl_crystal_description        prism 
_exptl_crystal_colour             colorless 
_exptl_crystal_size_max           0.24 
_exptl_crystal_size_mid           0.18 
_exptl_crystal_size_min           0.16 
_exptl_crystal_density_meas       ? 
_exptl_crystal_density_diffrn     1.499 
_exptl_crystal_density_method     'not measured' 
_exptl_crystal_F_000              1240 
_exptl_absorpt_coefficient_mu     1.708 
_exptl_absorpt_correction_type    multi-scan 
_exptl_absorpt_correction_T_min   0.6847 
_exptl_absorpt_correction_T_max   0.7717 
_exptl_absorpt_process_details    CrystalClear
  
_exptl_special_details 
; 
 ? 
; 
  
_diffrn_ambient_temperature       113(2) 
_diffrn_radiation_wavelength      0.71075 
_diffrn_radiation_type            MoK\a 
_diffrn_radiation_source          'rotating anode' 
_diffrn_radiation_monochromator   multilayer
_diffrn_measurement_device_type   'Rigaku Saturn724 CCD' 
_diffrn_measurement_method        \w 
_diffrn_detector_area_resol_mean  14.222 
_diffrn_standards_number          0 
_diffrn_standards_interval_count  0 
_diffrn_standards_interval_time   0 
_diffrn_standards_decay_%         0 
_diffrn_reflns_number             19452 
_diffrn_reflns_av_R_equivalents   0.1079 
_diffrn_reflns_av_sigmaI/netI     0.1422 
_diffrn_reflns_limit_h_min        -13 
_diffrn_reflns_limit_h_max        13 
_diffrn_reflns_limit_k_min        -11 
_diffrn_reflns_limit_k_max        6 
_diffrn_reflns_limit_l_min        -40 
_diffrn_reflns_limit_l_max        40 
_diffrn_reflns_theta_min          2.09 
_diffrn_reflns_theta_max          27.88 
_reflns_number_total              6367 
_reflns_number_gt                 5325 
_reflns_threshold_expression      >2sigma(I) 
  
_computing_data_collection        'CrystalClear-SM Expert 2.0 r2 (Rigaku, 2009)' 
_computing_cell_refinement        'CrystalClear-SM Expert 2.0 r2' 
_computing_data_reduction         'CrystalClear-SM Expert 2.0 r2' 
_computing_structure_solution     'SHELXS-97 (Sheldrick, 1990)' 
_computing_structure_refinement   'SHELXL-97 (Sheldrick, 1997)' 
_computing_molecular_graphics     'CrystalStructure 4.0' 
_computing_publication_material   'CrystalStructure 4.0 (Rigaku, 2009)' 
  
_refine_special_details 
; 
 Refinement of F^2^ against ALL reflections.  The weighted R-factor wR and 
 goodness of fit S are based on F^2^, conventional R-factors R are based 
 on F, with F set to zero for negative F^2^. The threshold expression of 
 F^2^ > 2sigma(F^2^) is used only for calculating R-factors(gt) etc. and is 
 not relevant to the choice of reflections for refinement.  R-factors based 
 on F^2^ are statistically about twice as large as those based on F, and R- 
 factors based on ALL data will be even larger. 
; 
  
_refine_ls_structure_factor_coef  Fsqd 
_refine_ls_matrix_type            full 
_refine_ls_weighting_scheme       calc 
_refine_ls_weighting_details 
 'calc w=1/[\s^2^(Fo^2^)+(0.0000P)^2^+0.0000P] where P=(Fo^2^+2Fc^2^)/3' 
_atom_sites_solution_primary      direct 
_atom_sites_solution_secondary    difmap 
_atom_sites_solution_hydrogens    geom 
_refine_ls_hydrogen_treatment     mixed 
_refine_ls_extinction_method      none 
_refine_ls_extinction_coef        ? 
_refine_ls_abs_structure_details 
 'Flack H D (1983), Acta Cryst. A39, 876-881' 
_refine_ls_abs_structure_Flack    -0.012(8) 
_refine_ls_number_reflns          6367 
_refine_ls_number_parameters      348 
_refine_ls_number_restraints      0 
_refine_ls_R_factor_all           0.0637 
_refine_ls_R_factor_gt            0.0538 
_refine_ls_wR_factor_ref          0.1010 
_refine_ls_wR_factor_gt           0.0940 
_refine_ls_goodness_of_fit_ref    0.842 
_refine_ls_restrained_S_all       0.842 
_refine_ls_shift/su_max           0.001 
_refine_ls_shift/su_mean          0.000 
  
loop_ 
 _atom_site_label 
 _atom_site_type_symbol 
 _atom_site_fract_x 
 _atom_site_fract_y 
 _atom_site_fract_z 
 _atom_site_U_iso_or_equiv 
 _atom_site_adp_type 
 _atom_site_occupancy 
 _atom_site_symmetry_multiplicity 
 _atom_site_calc_flag 
 _atom_site_refinement_flags 
 _atom_site_disorder_assembly 
 _atom_site_disorder_group 
Br1 Br 0.56737(5) 0.78445(6) 0.820963(13) 0.03011(12) Uani 1 1 d . . . 
S1 S 0.18849(10) 0.58181(13) 0.63179(3) 0.0214(2) Uani 1 1 d . . . 
P1 P 0.21823(9) 0.80076(14) 0.64735(3) 0.0166(2) Uani 1 1 d . . . 
O1 O 0.6534(3) 0.9433(3) 0.63376(9) 0.0207(6) Uani 1 1 d . . . 
O2 O 0.7709(3) 0.4194(4) 0.59530(11) 0.0396(9) Uani 1 1 d . . . 
O3 O 0.5606(3) 0.4837(3) 0.58569(8) 0.0218(6) Uani 1 1 d . . . 
N1 N 0.3707(3) 0.8552(4) 0.63986(10) 0.0168(7) Uani 1 1 d . . . 
C1 C 0.5963(4) 0.8036(5) 0.61302(11) 0.0166(8) Uani 1 1 d . . . 
C2 C 0.4869(3) 0.7582(5) 0.64552(11) 0.0168(8) Uani 1 1 d . . . 
H2 H 0.4659 0.6432 0.6441 0.020 Uiso 1 1 calc R . . 
C3 C 0.5552(4) 0.8009(5) 0.68759(12) 0.0170(8) Uani 1 1 d . . . 
C4 C 0.6460(4) 0.9146(5) 0.67795(13) 0.0191(8) Uani 1 1 d . . . 
C5 C 0.7199(4) 0.9880(5) 0.70936(12) 0.0213(9) Uani 1 1 d . . . 
H5 H 0.7837 1.0648 0.7021 0.026 Uiso 1 1 calc R . . 
C6 C 0.6966(4) 0.9438(5) 0.75239(13) 0.0226(9) Uani 1 1 d . . . 
H6 H 0.7459 0.9905 0.7751 0.027 Uiso 1 1 calc R . . 
C7 C 0.6043(4) 0.8351(5) 0.76205(12) 0.0202(9) Uani 1 1 d . . . 
C8 C 0.5315(4) 0.7584(5) 0.73012(11) 0.0193(9) Uani 1 1 d . . . 
H8 H 0.4685 0.6806 0.7373 0.023 Uiso 1 1 calc R . . 
C9 C 0.5557(4) 0.8515(4) 0.56736(11) 0.0176(8) Uani 1 1 d . . . 
C10 C 0.4443(4) 0.7899(5) 0.54784(11) 0.0220(9) Uani 1 1 d . . . 
H10 H 0.3918 0.7161 0.5631 0.026 Uiso 1 1 calc R . . 
C11 C 0.4097(4) 0.8364(5) 0.50596(12) 0.0257(10) Uani 1 1 d . . . 
H11 H 0.3323 0.7966 0.4931 0.031 Uiso 1 1 calc R . . 
C12 C 0.4870(4) 0.9397(5) 0.48331(13) 0.0271(10) Uani 1 1 d . . . 
H12 H 0.4628 0.9717 0.4548 0.033 Uiso 1 1 calc R . . 
C13 C 0.6003(5) 0.9971(5) 0.50185(14) 0.0289(10) Uani 1 1 d . . . 
H13 H 0.6550 1.0665 0.4859 0.035 Uiso 1 1 calc R . . 
C14 C 0.6341(4) 0.9530(5) 0.54413(13) 0.0229(9) Uani 1 1 d . . . 
H14 H 0.7116 0.9931 0.5569 0.028 Uiso 1 1 calc R . . 
C15 C 0.7063(4) 0.6824(5) 0.61151(12) 0.0176(8) Uani 1 1 d . . . 
C16 C 0.8297(4) 0.7199(6) 0.61957(12) 0.0271(10) Uani 1 1 d . . . 
H16A H 0.8964 0.6433 0.6160 0.033 Uiso 1 1 calc R . . 
H16B H 0.8513 0.8234 0.6289 0.033 Uiso 1 1 calc R . . 
C17 C 0.6841(4) 0.5155(5) 0.59689(13) 0.0230(9) Uani 1 1 d . . . 
C18 C 0.5398(4) 0.3234(5) 0.57048(13) 0.0273(10) Uani 1 1 d . . . 
H18A H 0.5656 0.2472 0.5933 0.033 Uiso 1 1 calc R . . 
H18B H 0.5930 0.3031 0.5442 0.033 Uiso 1 1 calc R . . 
C19 C 0.3968(4) 0.3051(5) 0.56001(13) 0.0295(10) Uani 1 1 d . . . 
H19A H 0.3450 0.3265 0.5861 0.035 Uiso 1 1 calc R . . 
H19B H 0.3800 0.1973 0.5501 0.035 Uiso 1 1 calc R . . 
H19C H 0.3726 0.3797 0.5370 0.035 Uiso 1 1 calc R . . 
C20 C 0.1294(4) 0.9399(5) 0.61462(12) 0.0181(8) Uani 1 1 d . . . 
C21 C 0.0848(5) 1.0823(5) 0.63085(14) 0.0332(12) Uani 1 1 d . . . 
H21 H 0.1005 1.1090 0.6604 0.040 Uiso 1 1 calc R . . 
C22 C 0.0172(5) 1.1868(6) 0.60410(15) 0.0426(14) Uani 1 1 d . . . 
H22 H -0.0118 1.2851 0.6153 0.051 Uiso 1 1 calc R . . 
C23 C -0.0074(4) 1.1479(5) 0.56171(14) 0.0285(10) Uani 1 1 d . . . 
H23 H -0.0554 1.2182 0.5438 0.034 Uiso 1 1 calc R . . 
C24 C 0.0371(5) 1.0070(6) 0.54483(13) 0.0293(11) Uani 1 1 d . . . 
H24 H 0.0214 0.9811 0.5152 0.035 Uiso 1 1 calc R . . 
C25 C 0.1050(4) 0.9038(5) 0.57139(13) 0.0284(11) Uani 1 1 d . . . 
H25 H 0.1353 0.8067 0.5598 0.034 Uiso 1 1 calc R . . 
C26 C 0.1718(4) 0.8403(5) 0.70308(11) 0.0173(8) Uani 1 1 d . . . 
C27 C 0.2455(4) 0.9351(5) 0.72987(12) 0.0204(9) Uani 1 1 d . . . 
H27 H 0.3228 0.9822 0.7190 0.024 Uiso 1 1 calc R . . 
C28 C 0.2081(4) 0.9626(5) 0.77270(13) 0.0260(10) Uani 1 1 d . . . 
H28 H 0.2599 1.0276 0.7910 0.031 Uiso 1 1 calc R . . 
C29 C 0.0950(4) 0.8948(5) 0.78849(14) 0.0293(11) Uani 1 1 d . . . 
H29 H 0.0696 0.9123 0.8178 0.035 Uiso 1 1 calc R . . 
C30 C 0.0186(4) 0.8015(6) 0.76172(13) 0.0268(10) Uani 1 1 d . . . 
H30 H -0.0596 0.7563 0.7726 0.032 Uiso 1 1 calc R . . 
C31 C 0.0562(4) 0.7743(5) 0.71933(12) 0.0250(9) Uani 1 1 d . . . 
H31 H 0.0036 0.7104 0.7010 0.030 Uiso 1 1 calc R . . 
H1 H 0.388(4) 0.952(5) 0.6351(14) 0.037(15) Uiso 1 1 d . . . 
  
loop_ 
 _atom_site_aniso_label 
 _atom_site_aniso_U_11 
 _atom_site_aniso_U_22 
 _atom_site_aniso_U_33 
 _atom_site_aniso_U_23 
 _atom_site_aniso_U_13 
 _atom_site_aniso_U_12 
Br1 0.0440(3) 0.0280(2) 0.01839(19) -0.00218(18) -0.00243(19) -0.0012(2) 
S1 0.0179(5) 0.0204(6) 0.0260(5) -0.0010(4) -0.0016(4) 0.0001(5) 
P1 0.0106(5) 0.0205(6) 0.0186(4) -0.0013(4) -0.0008(4) 0.0014(4) 
O1 0.0184(15) 0.0210(16) 0.0225(14) -0.0042(12) -0.0010(12) -0.0028(13) 
O2 0.0249(18) 0.029(2) 0.065(2) -0.0050(18) 0.0047(17) 0.0120(16) 
O3 0.0196(15) 0.0188(15) 0.0271(14) -0.0035(12) 0.0006(13) 0.0006(14) 
N1 0.0115(16) 0.022(2) 0.0173(16) -0.0009(14) -0.0009(13) 0.0005(15) 
C1 0.0172(19) 0.014(2) 0.0182(17) -0.0043(15) -0.0005(15) -0.0032(17) 
C2 0.0100(17) 0.022(2) 0.0185(17) -0.0008(16) 0.0032(14) -0.0023(16) 
C3 0.0100(17) 0.019(2) 0.0221(18) -0.0029(16) -0.0015(14) 0.0034(18) 
C4 0.0142(19) 0.021(2) 0.0223(19) -0.0041(18) 0.0009(16) 0.0035(17) 
C5 0.021(2) 0.019(2) 0.0232(19) -0.0047(17) -0.0008(17) -0.0009(18) 
C6 0.016(2) 0.026(2) 0.026(2) -0.0078(18) -0.0064(17) 0.0028(18) 
C7 0.028(2) 0.018(2) 0.0144(18) 0.0006(15) -0.0049(16) 0.0035(18) 
C8 0.019(2) 0.019(2) 0.0203(18) 0.0027(16) 0.0012(15) -0.0006(17) 
C9 0.017(2) 0.018(2) 0.0178(17) -0.0021(15) 0.0039(16) -0.0006(18) 
C10 0.018(2) 0.025(2) 0.0229(19) -0.0032(17) -0.0017(16) 0.002(2) 
C11 0.028(2) 0.026(2) 0.024(2) -0.0064(18) -0.0030(18) 0.001(2) 
C12 0.035(3) 0.027(3) 0.019(2) -0.0019(18) -0.0009(18) 0.006(2) 
C13 0.034(3) 0.023(2) 0.030(2) 0.0017(19) 0.002(2) -0.002(2) 
C14 0.018(2) 0.026(3) 0.024(2) 0.0000(18) -0.0012(16) -0.0018(19) 
C15 0.0138(19) 0.020(2) 0.0186(17) 0.0028(16) -0.0004(15) 0.0045(17) 
C16 0.021(2) 0.037(3) 0.0228(19) -0.003(2) 0.0023(16) 0.003(2) 
C17 0.017(2) 0.029(2) 0.0230(19) 0.0038(18) 0.0031(17) 0.002(2) 
C18 0.033(3) 0.022(2) 0.027(2) -0.0055(18) 0.0055(19) -0.003(2) 
C19 0.029(3) 0.029(3) 0.030(2) -0.006(2) 0.0015(18) -0.007(2) 
C20 0.0144(19) 0.018(2) 0.0220(19) 0.0018(16) -0.0027(16) -0.0010(17) 
C21 0.044(3) 0.026(3) 0.029(2) -0.0088(19) -0.012(2) 0.017(2) 
C22 0.055(3) 0.030(3) 0.043(3) -0.008(2) -0.017(2) 0.025(3) 
C23 0.029(3) 0.024(3) 0.033(2) 0.002(2) -0.010(2) 0.005(2) 
C24 0.041(3) 0.029(3) 0.0180(19) 0.0004(18) -0.0061(19) 0.009(2) 
C25 0.032(3) 0.032(3) 0.021(2) -0.0001(19) -0.0045(18) 0.012(2) 
C26 0.0164(19) 0.020(2) 0.0153(17) 0.0005(16) -0.0010(15) 0.0013(17) 
C27 0.015(2) 0.022(2) 0.024(2) -0.0018(18) 0.0024(16) 0.0000(18) 
C28 0.029(3) 0.027(3) 0.022(2) -0.0025(18) 0.0010(18) 0.000(2) 
C29 0.035(3) 0.029(3) 0.024(2) -0.0016(19) 0.0061(19) 0.007(2) 
C30 0.021(2) 0.028(3) 0.031(2) 0.011(2) 0.0102(17) 0.004(2) 
C31 0.018(2) 0.029(2) 0.028(2) 0.0039(19) -0.0001(17) -0.004(2) 
  
_geom_special_details 
; 
 All esds (except the esd in the dihedral angle between two l.s. planes) 
 are estimated using the full covariance matrix.  The cell esds are taken 
 into account individually in the estimation of esds in distances, angles 
 and torsion angles; correlations between esds in cell parameters are only 
 used when they are defined by crystal symmetry.  An approximate (isotropic) 
 treatment of cell esds is used for estimating esds involving l.s. planes. 
; 
  
loop_ 
 _geom_bond_atom_site_label_1 
 _geom_bond_atom_site_label_2 
 _geom_bond_distance 
 _geom_bond_site_symmetry_2 
 _geom_bond_publ_flag 
Br1 C7 1.900(4) . ? 
S1 P1 1.9427(16) . ? 
P1 N1 1.647(3) . ? 
P1 C20 1.799(4) . ? 
P1 C26 1.811(4) . ? 
O1 C4 1.383(5) . ? 
O1 C1 1.468(4) . ? 
O2 C17 1.209(5) . ? 
O3 C17 1.340(5) . ? 
O3 C18 1.454(4) . ? 
N1 C2 1.459(5) . ? 
N1 H1 0.85(4) . ? 
C1 C9 1.520(5) . ? 
C1 C15 1.527(5) . ? 
C1 C2 1.552(5) . ? 
C2 C3 1.516(5) . ? 
C2 H2 1.0000 . ? 
C3 C4 1.374(5) . ? 
C3 C8 1.378(5) . ? 
C4 C5 1.377(5) . ? 
C5 C6 1.396(5) . ? 
C5 H5 0.9500 . ? 
C6 C7 1.355(5) . ? 
C6 H6 0.9500 . ? 
C7 C8 1.395(5) . ? 
C8 H8 0.9500 . ? 
C9 C14 1.378(5) . ? 
C9 C10 1.393(5) . ? 
C10 C11 1.393(5) . ? 
C10 H10 0.9500 . ? 
C11 C12 1.372(6) . ? 
C11 H11 0.9500 . ? 
C12 C13 1.384(6) . ? 
C12 H12 0.9500 . ? 
C13 C14 1.397(5) . ? 
C13 H13 0.9500 . ? 
C14 H14 0.9500 . ? 
C15 C16 1.329(5) . ? 
C15 C17 1.503(6) . ? 
C16 H16A 0.9500 . ? 
C16 H16B 0.9500 . ? 
C18 C19 1.510(5) . ? 
C18 H18A 0.9900 . ? 
C18 H18B 0.9900 . ? 
C19 H19A 0.9800 . ? 
C19 H19B 0.9800 . ? 
C19 H19C 0.9800 . ? 
C20 C21 1.385(5) . ? 
C20 C25 1.387(5) . ? 
C21 C22 1.395(6) . ? 
C21 H21 0.9500 . ? 
C22 C23 1.368(5) . ? 
C22 H22 0.9500 . ? 
C23 C24 1.381(6) . ? 
C23 H23 0.9500 . ? 
C24 C25 1.385(5) . ? 
C24 H24 0.9500 . ? 
C25 H25 0.9500 . ? 
C26 C27 1.377(5) . ? 
C26 C31 1.403(5) . ? 
C27 C28 1.391(5) . ? 
C27 H27 0.9500 . ? 
C28 C29 1.383(6) . ? 
C28 H28 0.9500 . ? 
C29 C30 1.385(6) . ? 
C29 H29 0.9500 . ? 
C30 C31 1.379(5) . ? 
C30 H30 0.9500 . ? 
C31 H31 0.9500 . ? 
  
loop_ 
 _geom_angle_atom_site_label_1 
 _geom_angle_atom_site_label_2 
 _geom_angle_atom_site_label_3 
 _geom_angle 
 _geom_angle_site_symmetry_1 
 _geom_angle_site_symmetry_3 
 _geom_angle_publ_flag 
N1 P1 C20 102.64(18) . . ? 
N1 P1 C26 109.28(18) . . ? 
C20 P1 C26 105.92(18) . . ? 
N1 P1 S1 112.53(14) . . ? 
C20 P1 S1 114.22(14) . . ? 
C26 P1 S1 111.67(14) . . ? 
C4 O1 C1 105.2(3) . . ? 
C17 O3 C18 114.2(3) . . ? 
C2 N1 P1 126.9(3) . . ? 
C2 N1 H1 113(3) . . ? 
P1 N1 H1 120(3) . . ? 
O1 C1 C9 107.1(3) . . ? 
O1 C1 C15 105.2(3) . . ? 
C9 C1 C15 110.8(3) . . ? 
O1 C1 C2 102.1(3) . . ? 
C9 C1 C2 117.5(3) . . ? 
C15 C1 C2 112.8(3) . . ? 
N1 C2 C3 110.1(3) . . ? 
N1 C2 C1 112.0(3) . . ? 
C3 C2 C1 99.0(3) . . ? 
N1 C2 H2 111.7 . . ? 
C3 C2 H2 111.7 . . ? 
C1 C2 H2 111.7 . . ? 
C4 C3 C8 120.5(4) . . ? 
C4 C3 C2 107.3(3) . . ? 
C8 C3 C2 131.8(4) . . ? 
C3 C4 C5 122.7(4) . . ? 
C3 C4 O1 111.9(3) . . ? 
C5 C4 O1 125.4(4) . . ? 
C4 C5 C6 116.7(4) . . ? 
C4 C5 H5 121.7 . . ? 
C6 C5 H5 121.7 . . ? 
C7 C6 C5 120.7(4) . . ? 
C7 C6 H6 119.7 . . ? 
C5 C6 H6 119.7 . . ? 
C6 C7 C8 122.5(4) . . ? 
C6 C7 Br1 120.2(3) . . ? 
C8 C7 Br1 117.3(3) . . ? 
C3 C8 C7 116.8(4) . . ? 
C3 C8 H8 121.6 . . ? 
C7 C8 H8 121.6 . . ? 
C14 C9 C10 119.4(4) . . ? 
C14 C9 C1 119.0(4) . . ? 
C10 C9 C1 121.5(4) . . ? 
C9 C10 C11 120.1(4) . . ? 
C9 C10 H10 120.0 . . ? 
C11 C10 H10 120.0 . . ? 
C12 C11 C10 120.2(4) . . ? 
C12 C11 H11 119.9 . . ? 
C10 C11 H11 119.9 . . ? 
C11 C12 C13 120.1(4) . . ? 
C11 C12 H12 119.9 . . ? 
C13 C12 H12 119.9 . . ? 
C12 C13 C14 119.8(4) . . ? 
C12 C13 H13 120.1 . . ? 
C14 C13 H13 120.1 . . ? 
C9 C14 C13 120.4(4) . . ? 
C9 C14 H14 119.8 . . ? 
C13 C14 H14 119.8 . . ? 
C16 C15 C17 115.2(4) . . ? 
C16 C15 C1 122.5(4) . . ? 
C17 C15 C1 122.1(3) . . ? 
C15 C16 H16A 120.0 . . ? 
C15 C16 H16B 120.0 . . ? 
H16A C16 H16B 120.0 . . ? 
O2 C17 O3 123.4(4) . . ? 
O2 C17 C15 122.4(4) . . ? 
O3 C17 C15 114.2(4) . . ? 
O3 C18 C19 107.9(3) . . ? 
O3 C18 H18A 110.1 . . ? 
C19 C18 H18A 110.1 . . ? 
O3 C18 H18B 110.1 . . ? 
C19 C18 H18B 110.1 . . ? 
H18A C18 H18B 108.4 . . ? 
C18 C19 H19A 109.5 . . ? 
C18 C19 H19B 109.5 . . ? 
H19A C19 H19B 109.5 . . ? 
C18 C19 H19C 109.5 . . ? 
H19A C19 H19C 109.5 . . ? 
H19B C19 H19C 109.5 . . ? 
C21 C20 C25 118.6(4) . . ? 
C21 C20 P1 122.6(3) . . ? 
C25 C20 P1 118.9(3) . . ? 
C20 C21 C22 120.4(4) . . ? 
C20 C21 H21 119.8 . . ? 
C22 C21 H21 119.8 . . ? 
C23 C22 C21 120.0(5) . . ? 
C23 C22 H22 120.0 . . ? 
C21 C22 H22 120.0 . . ? 
C22 C23 C24 120.4(4) . . ? 
C22 C23 H23 119.8 . . ? 
C24 C23 H23 119.8 . . ? 
C23 C24 C25 119.5(4) . . ? 
C23 C24 H24 120.3 . . ? 
C25 C24 H24 120.3 . . ? 
C24 C25 C20 121.1(4) . . ? 
C24 C25 H25 119.5 . . ? 
C20 C25 H25 119.5 . . ? 
C27 C26 C31 119.0(4) . . ? 
C27 C26 P1 122.0(3) . . ? 
C31 C26 P1 119.0(3) . . ? 
C26 C27 C28 120.9(4) . . ? 
C26 C27 H27 119.6 . . ? 
C28 C27 H27 119.6 . . ? 
C29 C28 C27 119.6(4) . . ? 
C29 C28 H28 120.2 . . ? 
C27 C28 H28 120.2 . . ? 
C28 C29 C30 120.2(4) . . ? 
C28 C29 H29 119.9 . . ? 
C30 C29 H29 119.9 . . ? 
C31 C30 C29 120.0(4) . . ? 
C31 C30 H30 120.0 . . ? 
C29 C30 H30 120.0 . . ? 
C30 C31 C26 120.4(4) . . ? 
C30 C31 H31 119.8 . . ? 
C26 C31 H31 119.8 . . ? 
  
loop_ 
 _geom_torsion_atom_site_label_1 
 _geom_torsion_atom_site_label_2 
 _geom_torsion_atom_site_label_3 
 _geom_torsion_atom_site_label_4 
 _geom_torsion 
 _geom_torsion_site_symmetry_1 
 _geom_torsion_site_symmetry_2 
 _geom_torsion_site_symmetry_3 
 _geom_torsion_site_symmetry_4 
 _geom_torsion_publ_flag 
C20 P1 N1 C2 -157.2(3) . . . . ? 
C26 P1 N1 C2 90.7(3) . . . . ? 
S1 P1 N1 C2 -34.0(3) . . . . ? 
C4 O1 C1 C9 159.3(3) . . . . ? 
C4 O1 C1 C15 -82.7(3) . . . . ? 
C4 O1 C1 C2 35.2(3) . . . . ? 
P1 N1 C2 C3 -103.9(4) . . . . ? 
P1 N1 C2 C1 147.0(3) . . . . ? 
O1 C1 C2 N1 80.0(3) . . . . ? 
C9 C1 C2 N1 -36.8(5) . . . . ? 
C15 C1 C2 N1 -167.6(3) . . . . ? 
O1 C1 C2 C3 -36.0(3) . . . . ? 
C9 C1 C2 C3 -152.9(3) . . . . ? 
C15 C1 C2 C3 76.3(4) . . . . ? 
N1 C2 C3 C4 -91.9(4) . . . . ? 
C1 C2 C3 C4 25.6(4) . . . . ? 
N1 C2 C3 C8 80.7(5) . . . . ? 
C1 C2 C3 C8 -161.8(4) . . . . ? 
C8 C3 C4 C5 1.9(6) . . . . ? 
C2 C3 C4 C5 175.5(4) . . . . ? 
C8 C3 C4 O1 -178.5(3) . . . . ? 
C2 C3 C4 O1 -4.9(4) . . . . ? 
C1 O1 C4 C3 -19.9(4) . . . . ? 
C1 O1 C4 C5 159.7(4) . . . . ? 
C3 C4 C5 C6 -1.3(6) . . . . ? 
O1 C4 C5 C6 179.1(4) . . . . ? 
C4 C5 C6 C7 -0.7(6) . . . . ? 
C5 C6 C7 C8 2.1(6) . . . . ? 
C5 C6 C7 Br1 -176.7(3) . . . . ? 
C4 C3 C8 C7 -0.5(6) . . . . ? 
C2 C3 C8 C7 -172.3(4) . . . . ? 
C6 C7 C8 C3 -1.5(6) . . . . ? 
Br1 C7 C8 C3 177.3(3) . . . . ? 
O1 C1 C9 C14 38.4(5) . . . . ? 
C15 C1 C9 C14 -75.9(5) . . . . ? 
C2 C1 C9 C14 152.4(4) . . . . ? 
O1 C1 C9 C10 -144.5(4) . . . . ? 
C15 C1 C9 C10 101.2(4) . . . . ? 
C2 C1 C9 C10 -30.5(5) . . . . ? 
C14 C9 C10 C11 -2.9(6) . . . . ? 
C1 C9 C10 C11 180.0(4) . . . . ? 
C9 C10 C11 C12 1.8(6) . . . . ? 
C10 C11 C12 C13 0.5(7) . . . . ? 
C11 C12 C13 C14 -1.6(7) . . . . ? 
C10 C9 C14 C13 1.8(6) . . . . ? 
C1 C9 C14 C13 179.0(4) . . . . ? 
C12 C13 C14 C9 0.5(7) . . . . ? 
O1 C1 C15 C16 -12.3(5) . . . . ? 
C9 C1 C15 C16 103.1(4) . . . . ? 
C2 C1 C15 C16 -122.8(4) . . . . ? 
O1 C1 C15 C17 173.3(3) . . . . ? 
C9 C1 C15 C17 -71.3(5) . . . . ? 
C2 C1 C15 C17 62.8(4) . . . . ? 
C18 O3 C17 O2 -1.2(6) . . . . ? 
C18 O3 C17 C15 178.5(3) . . . . ? 
C16 C15 C17 O2 4.6(6) . . . . ? 
C1 C15 C17 O2 179.4(4) . . . . ? 
C16 C15 C17 O3 -175.1(3) . . . . ? 
C1 C15 C17 O3 -0.3(5) . . . . ? 
C17 O3 C18 C19 179.0(3) . . . . ? 
N1 P1 C20 C21 -90.1(4) . . . . ? 
C26 P1 C20 C21 24.5(4) . . . . ? 
S1 P1 C20 C21 147.8(3) . . . . ? 
N1 P1 C20 C25 89.6(4) . . . . ? 
C26 P1 C20 C25 -155.8(3) . . . . ? 
S1 P1 C20 C25 -32.5(4) . . . . ? 
C25 C20 C21 C22 -0.1(7) . . . . ? 
P1 C20 C21 C22 179.5(4) . . . . ? 
C20 C21 C22 C23 1.0(8) . . . . ? 
C21 C22 C23 C24 -1.6(8) . . . . ? 
C22 C23 C24 C25 1.2(7) . . . . ? 
C23 C24 C25 C20 -0.3(7) . . . . ? 
C21 C20 C25 C24 -0.3(7) . . . . ? 
P1 C20 C25 C24 -179.9(4) . . . . ? 
N1 P1 C26 C27 14.0(4) . . . . ? 
C20 P1 C26 C27 -95.9(4) . . . . ? 
S1 P1 C26 C27 139.1(3) . . . . ? 
N1 P1 C26 C31 -166.9(3) . . . . ? 
C20 P1 C26 C31 83.2(4) . . . . ? 
S1 P1 C26 C31 -41.7(4) . . . . ? 
C31 C26 C27 C28 1.4(6) . . . . ? 
P1 C26 C27 C28 -179.5(3) . . . . ? 
C26 C27 C28 C29 -0.4(7) . . . . ? 
C27 C28 C29 C30 -0.7(7) . . . . ? 
C28 C29 C30 C31 0.9(7) . . . . ? 
C29 C30 C31 C26 0.1(7) . . . . ? 
C27 C26 C31 C30 -1.2(6) . . . . ? 
P1 C26 C31 C30 179.6(3) . . . . ? 
  
_diffrn_measured_fraction_theta_max    1.000 
_diffrn_reflns_theta_full              27.88 
_diffrn_measured_fraction_theta_full   1.000 
_refine_diff_density_max    0.759 
_refine_diff_density_min   -1.037 
_refine_diff_density_rms    0.095 
